# Supplementary material for: Innovative use of liquid crystalline acids as color developers in leuco dye-based temperature sensors
Source: Royal Society of Chemistry journal article supplement (doi:10.1039/d4ra01867b), 2024-01-01
Supplement: d4ra01867b1.pdf [file d4ra01867b1.pdf]

## Supporting Information

Crystal data for BF, DSC, PXRD, TG, absorption and emission spectra  
for BF:C4BA and BF:C6BA

### Innovative use of liquid crystalline acids as color developers in leuco dye-based temperature sensors

*Jakub Pawlów, Magdalena Wilk-Kozubek, Maciej Czajkowski, Maria Zdończyk, Joanna Cybińska*

**Table S1** Crystal data and details of the structure determination for BF.

|                                                   |                                                 |
|---------------------------------------------------|-------------------------------------------------|
| Empirical formula                                 | C <sub>28</sub> H <sub>23</sub> NO <sub>3</sub> |
| Formula weight (g mol <sup>-1</sup> )             | 421.47                                          |
| Crystal system, space group                       | Orthorhombic, <i>Pbca</i>                       |
| <i>a</i> (Å)                                      | 11.936(1)                                       |
| <i>b</i> (Å)                                      | 16.714(8)                                       |
| <i>c</i> (Å)                                      | 20.990(4)                                       |
| <i>V</i> (Å <sup>3</sup> )                        | 4188(3)                                         |
| <i>Z</i>                                          | 8                                               |
| <i>D</i> <sub>calc</sub> (g cm <sup>-3</sup> )    | 1.337                                           |
| $\mu$ (mm <sup>-1</sup> )                         | 0.691                                           |
| <i>F</i> (000)                                    | 1776                                            |
| Crystal size (mm)                                 | 0.187 x 0.263 x 0.364                           |
| Radiation type, wavelength, $\lambda$ (Å)         | Cu K $\alpha$ , 1.54184                         |
| Temperature (K)                                   | 100.00(10)                                      |
| $\theta$ Range (°)                                | 4.213–75.784                                    |
| Absorption correction                             | analytical                                      |
| <i>T</i> <sub>min</sub> / <i>T</i> <sub>max</sub> | 0.674/0.828                                     |
| Reflections collected/unique/observed             | 45736/4330/4286                                 |

|                                                                                    |                |
|------------------------------------------------------------------------------------|----------------|
| $R_{\text{int}}$                                                                   | 0.0157         |
| Refinement on                                                                      | $F^2$          |
| $R[F^2 > 2\sigma(F^2)]$                                                            | 0.0345         |
| $wR$ ( $F^2$ all reflections) <sup>a</sup>                                         | 0.0844         |
| Goodness-of-fit, $S$                                                               | 1.041          |
| $\Delta\rho_{\text{max}}, \Delta\rho_{\text{min}}$ ( $\text{e } \text{\AA}^{-3}$ ) | +0.225, -0.213 |

<sup>a</sup>  $wR = \{\sum[w(F_o^2 - F_c^2)^2]/\sum wF_o^4\}^{1/2}$ ;  $w^{-1} = [\sigma^2(F_o^2) + (0.0392P)^2 + 1.9043P]$  where  $P = (F_o^2 + 2F_c^2)/3$ .

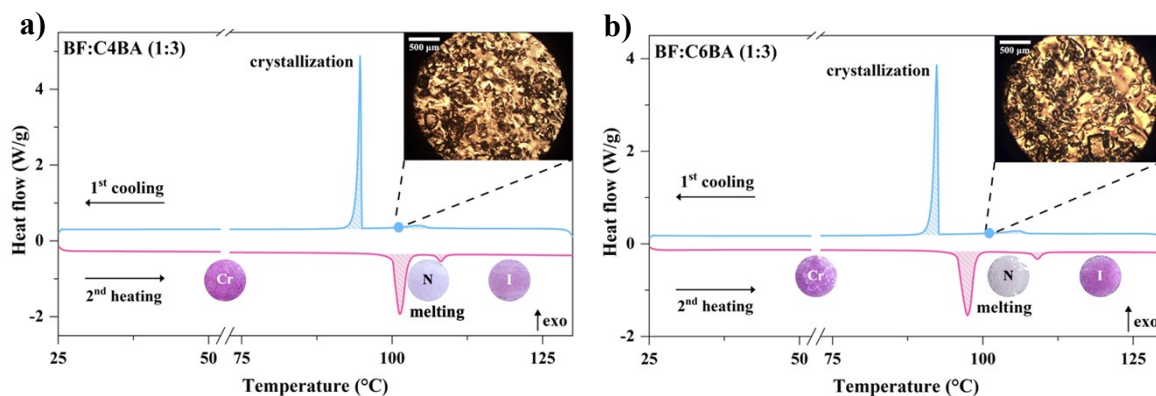

**Fig. S1** DSC curves of BF:C4BA (1:3) (a) and BF:C6BA (1:3) (b). In the insets, corresponding POM images taken at 105°C are presented.

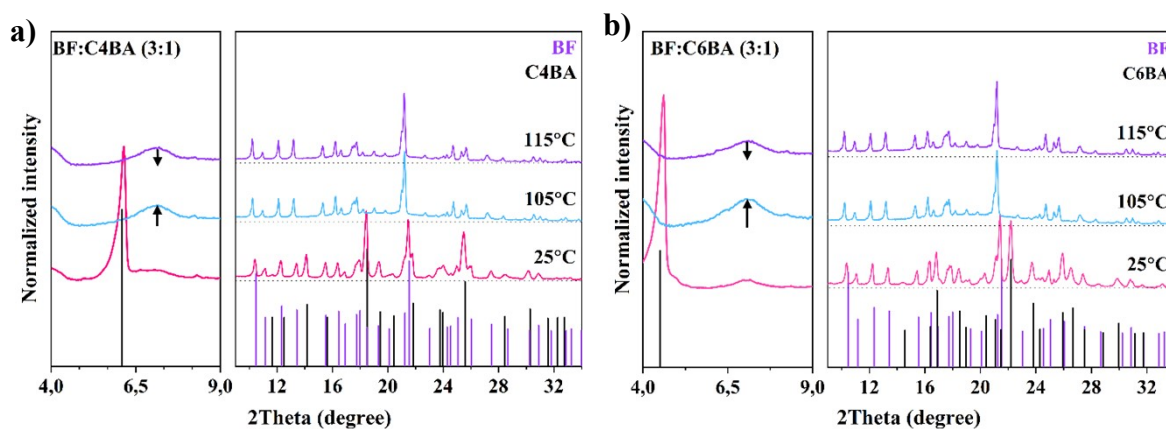

**Fig. S2** PXRD patterns of BF:C4BA (1:3) (a) and BF:C6BA (1:3) (b), measured at 25°C, 105°C and 115°C.

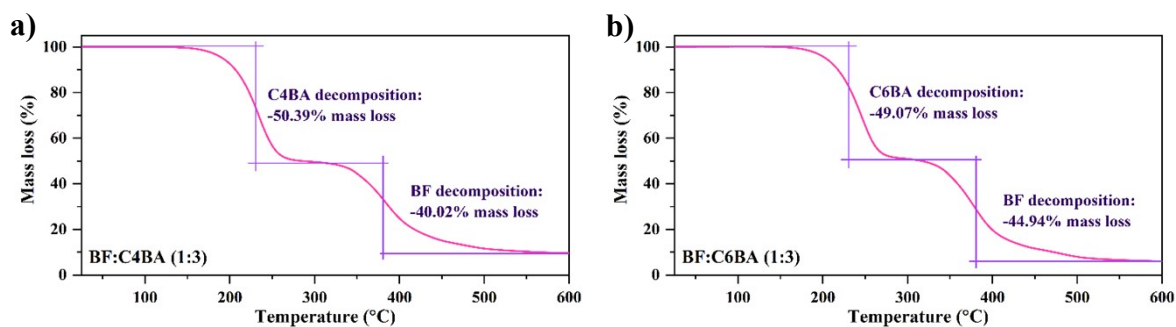

Fig. S3 TG curves of BF:C4BA (1:3) (a) and BF:C6BA (1:3) (b).

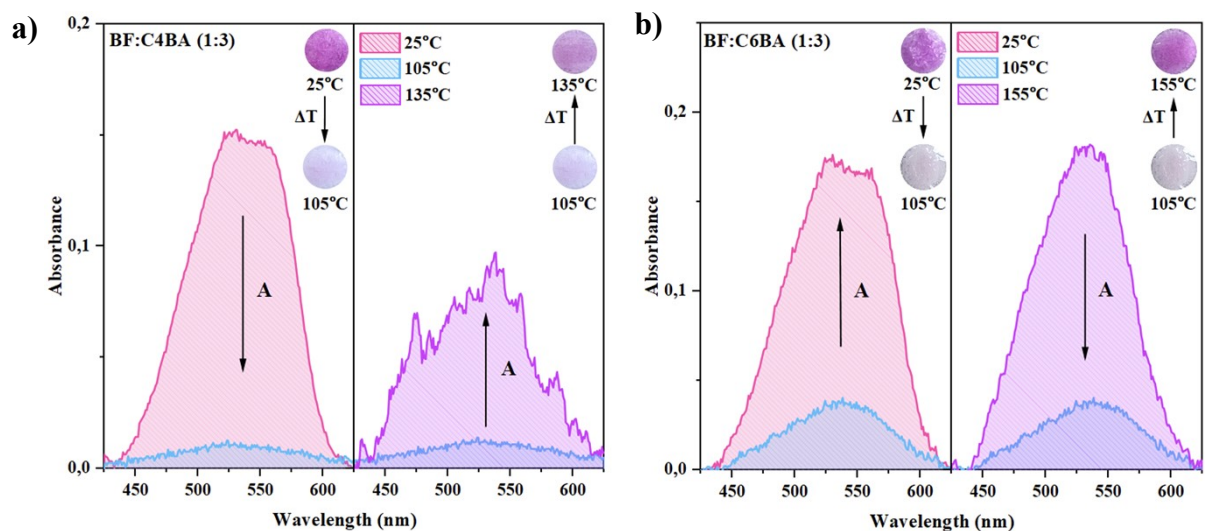

Fig. S4 Absorption spectra of BF:C4BA (1:3) (a) and BF:C6BA (1:3) (b), measured at 25 °C, 105 °C and 135/155 °C.

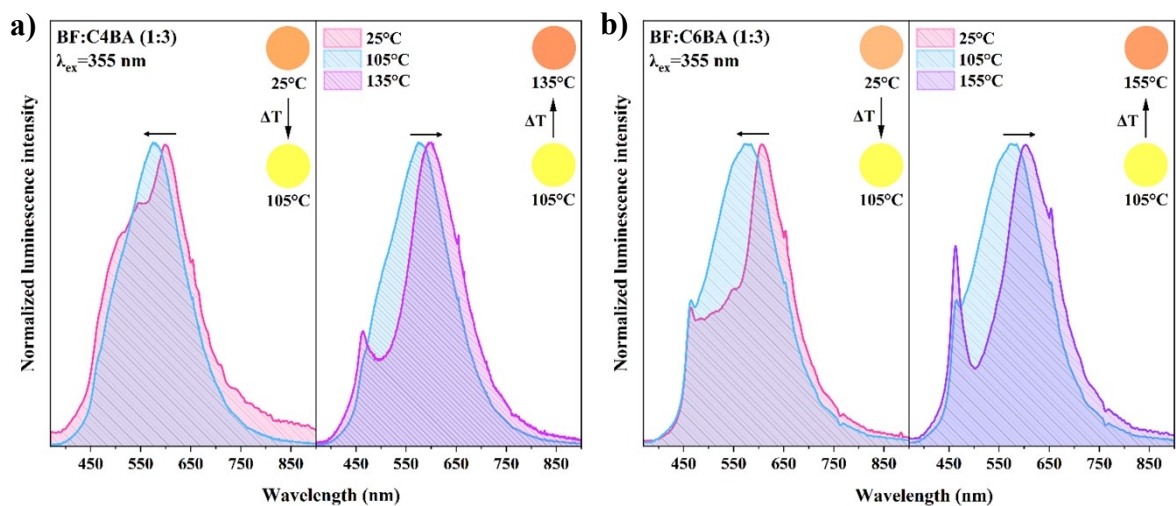

Fig. S5 Photoluminescence spectra BF:C4BA (1:3) (a) and BF:C6BA (1:3) (b), measured at 25 °C, 105 °C and 135/155 °C.

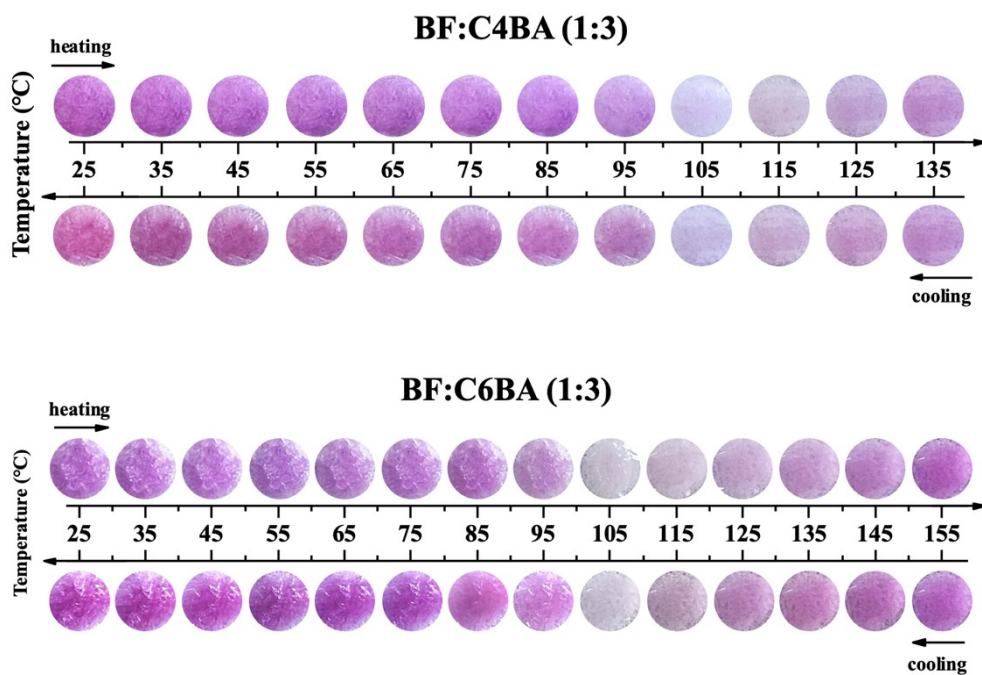

Fig. S6 Diagram presenting the color change of BF:C4BA (1:3) and BF:C6BA (1:3).
